# Supplementary material for: Causal role of peripheral immunity in gastroduodenal diseases: A Mendelian randomization study and meta-analysis
Source: Research Square preprint supplement (doi:10.21203/rs.3.rs-6612467/v1), 2025-05-16
Supplement: Supplementary file 1 [file 25d668b67e5260e9e4e378f8.xlsx]

## Sheet: heterogeneity
Table 1. Heterogeneity test.
	id.exposure	id.outcome	outcome	exposure	method	Q	Q_df	Q_pval
Chronic gastritis	ebi-a-GCST90001527	ukb-b-6716	Diagnoses - main ICD10: K29.5 Chronic gastritis, unspecified || id:ukb-b-6716	|| id:ebi-a-GCST90001527	MR Egger	0.00426002	1	0.94796
	ebi-a-GCST90001527	ukb-b-6716	Diagnoses - main ICD10: K29.5 Chronic gastritis, unspecified || id:ukb-b-6716	|| id:ebi-a-GCST90001527	Inverse variance weighted	1.39658	2	0.497435
	ebi-a-GCST90001544	ukb-b-6716	Diagnoses - main ICD10: K29.5 Chronic gastritis, unspecified || id:ukb-b-6716	|| id:ebi-a-GCST90001544	MR Egger	3.26735	1	0.0706715
	ebi-a-GCST90001544	ukb-b-6716	Diagnoses - main ICD10: K29.5 Chronic gastritis, unspecified || id:ukb-b-6716	|| id:ebi-a-GCST90001544	Inverse variance weighted	3.26776	2	0.19517
	ebi-a-GCST90001574	ukb-b-6716	Diagnoses - main ICD10: K29.5 Chronic gastritis, unspecified || id:ukb-b-6716	|| id:ebi-a-GCST90001574	MR Egger	0.963894	1	0.326208
	ebi-a-GCST90001574	ukb-b-6716	Diagnoses - main ICD10: K29.5 Chronic gastritis, unspecified || id:ukb-b-6716	|| id:ebi-a-GCST90001574	Inverse variance weighted	1.97897	2	0.371767
	ebi-a-GCST90001682	ukb-b-6716	Diagnoses - main ICD10: K29.5 Chronic gastritis, unspecified || id:ukb-b-6716	|| id:ebi-a-GCST90001682	MR Egger	1.22143	1	0.269079
	ebi-a-GCST90001682	ukb-b-6716	Diagnoses - main ICD10: K29.5 Chronic gastritis, unspecified || id:ukb-b-6716	|| id:ebi-a-GCST90001682	Inverse variance weighted	1.22711	2	0.541424
	ebi-a-GCST90001755	ukb-b-6716	Diagnoses - main ICD10: K29.5 Chronic gastritis, unspecified || id:ukb-b-6716	|| id:ebi-a-GCST90001755	MR Egger	2.38618	2	0.303283
	ebi-a-GCST90001755	ukb-b-6716	Diagnoses - main ICD10: K29.5 Chronic gastritis, unspecified || id:ukb-b-6716	|| id:ebi-a-GCST90001755	Inverse variance weighted	2.3877	3	0.495928
	ebi-a-GCST90001759	ukb-b-6716	Diagnoses - main ICD10: K29.5 Chronic gastritis, unspecified || id:ukb-b-6716	|| id:ebi-a-GCST90001759	MR Egger	4.36785	4	0.358506
	ebi-a-GCST90001759	ukb-b-6716	Diagnoses - main ICD10: K29.5 Chronic gastritis, unspecified || id:ukb-b-6716	|| id:ebi-a-GCST90001759	Inverse variance weighted	4.3876	5	0.495061
	ebi-a-GCST90001761	ukb-b-6716	Diagnoses - main ICD10: K29.5 Chronic gastritis, unspecified || id:ukb-b-6716	|| id:ebi-a-GCST90001761	MR Egger	2.37286	2	0.30531
	ebi-a-GCST90001761	ukb-b-6716	Diagnoses - main ICD10: K29.5 Chronic gastritis, unspecified || id:ukb-b-6716	|| id:ebi-a-GCST90001761	Inverse variance weighted	2.3848	3	0.496471
	ebi-a-GCST90001762	ukb-b-6716	Diagnoses - main ICD10: K29.5 Chronic gastritis, unspecified || id:ukb-b-6716	|| id:ebi-a-GCST90001762	MR Egger	4.31918	4	0.364529
	ebi-a-GCST90001762	ukb-b-6716	Diagnoses - main ICD10: K29.5 Chronic gastritis, unspecified || id:ukb-b-6716	|| id:ebi-a-GCST90001762	Inverse variance weighted	4.34066	5	0.501481
	ebi-a-GCST90001980	ukb-b-6716	Diagnoses - main ICD10: K29.5 Chronic gastritis, unspecified || id:ukb-b-6716	|| id:ebi-a-GCST90001980	MR Egger	3.58263	3	0.310202
	ebi-a-GCST90001980	ukb-b-6716	Diagnoses - main ICD10: K29.5 Chronic gastritis, unspecified || id:ukb-b-6716	|| id:ebi-a-GCST90001980	Inverse variance weighted	3.59755	4	0.463202
	ebi-a-GCST90001985	ukb-b-6716	Diagnoses - main ICD10: K29.5 Chronic gastritis, unspecified || id:ukb-b-6716	|| id:ebi-a-GCST90001985	MR Egger	2.83245	2	0.242628
	ebi-a-GCST90001985	ukb-b-6716	Diagnoses - main ICD10: K29.5 Chronic gastritis, unspecified || id:ukb-b-6716	|| id:ebi-a-GCST90001985	Inverse variance weighted	2.84719	3	0.41579
	ebi-a-GCST90001989	ukb-b-6716	Diagnoses - main ICD10: K29.5 Chronic gastritis, unspecified || id:ukb-b-6716	|| id:ebi-a-GCST90001989	Inverse variance weighted	0.818265	1	0.365688
	ebi-a-GCST90002006	ukb-b-6716	Diagnoses - main ICD10: K29.5 Chronic gastritis, unspecified || id:ukb-b-6716	|| id:ebi-a-GCST90002006	MR Egger	0.00118558	1	0.972532
	ebi-a-GCST90002006	ukb-b-6716	Diagnoses - main ICD10: K29.5 Chronic gastritis, unspecified || id:ukb-b-6716	|| id:ebi-a-GCST90002006	Inverse variance weighted	0.00488964	2	0.997558
	ebi-a-GCST90002090	ukb-b-6716	Diagnoses - main ICD10: K29.5 Chronic gastritis, unspecified || id:ukb-b-6716	|| id:ebi-a-GCST90002090	MR Egger	1.39929	1	0.236843
	ebi-a-GCST90002090	ukb-b-6716	Diagnoses - main ICD10: K29.5 Chronic gastritis, unspecified || id:ukb-b-6716	|| id:ebi-a-GCST90002090	Inverse variance weighted	1.64179	2	0.440039
Duodenal ulcer	ebi-a-GCST90001703	ukb-b-4725	Non-cancer illness code, self-reported: duodenal ulcer || id:ukb-b-4725	|| id:ebi-a-GCST90001703	MR Egger	1.31209	2	0.5189
	ebi-a-GCST90001703	ukb-b-4725	Non-cancer illness code, self-reported: duodenal ulcer || id:ukb-b-4725	|| id:ebi-a-GCST90001703	Inverse variance weighted	1.31732	3	0.725024
	ebi-a-GCST90001711	ukb-b-4725	Non-cancer illness code, self-reported: duodenal ulcer || id:ukb-b-4725	|| id:ebi-a-GCST90001711	MR Egger	0.405298	1	0.524366
	ebi-a-GCST90001711	ukb-b-4725	Non-cancer illness code, self-reported: duodenal ulcer || id:ukb-b-4725	|| id:ebi-a-GCST90001711	Inverse variance weighted	0.802344	2	0.669535
	ebi-a-GCST90001757	ukb-b-4725	Non-cancer illness code, self-reported: duodenal ulcer || id:ukb-b-4725	|| id:ebi-a-GCST90001757	MR Egger	4.31752	4	0.364736
	ebi-a-GCST90001757	ukb-b-4725	Non-cancer illness code, self-reported: duodenal ulcer || id:ukb-b-4725	|| id:ebi-a-GCST90001757	Inverse variance weighted	5.90042	5	0.31603
	ebi-a-GCST90001782	ukb-b-4725	Non-cancer illness code, self-reported: duodenal ulcer || id:ukb-b-4725	|| id:ebi-a-GCST90001782	Inverse variance weighted	0.954255	1	0.328639
	ebi-a-GCST90001886	ukb-b-4725	Non-cancer illness code, self-reported: duodenal ulcer || id:ukb-b-4725	|| id:ebi-a-GCST90001886	MR Egger	0.0335441	2	0.983368
	ebi-a-GCST90001886	ukb-b-4725	Non-cancer illness code, self-reported: duodenal ulcer || id:ukb-b-4725	|| id:ebi-a-GCST90001886	Inverse variance weighted	0.721962	3	0.868027
	ebi-a-GCST90001959	ukb-b-4725	Non-cancer illness code, self-reported: duodenal ulcer || id:ukb-b-4725	|| id:ebi-a-GCST90001959	MR Egger	1.33962	1	0.247102
	ebi-a-GCST90001959	ukb-b-4725	Non-cancer illness code, self-reported: duodenal ulcer || id:ukb-b-4725	|| id:ebi-a-GCST90001959	Inverse variance weighted	2.2225	2	0.329148
	ebi-a-GCST90002057	ukb-b-4725	Non-cancer illness code, self-reported: duodenal ulcer || id:ukb-b-4725	|| id:ebi-a-GCST90002057	MR Egger	0.0187819	1	0.890993
	ebi-a-GCST90002057	ukb-b-4725	Non-cancer illness code, self-reported: duodenal ulcer || id:ukb-b-4725	|| id:ebi-a-GCST90002057	Inverse variance weighted	0.0206947	2	0.989706
	ebi-a-GCST90002080	ukb-b-4725	Non-cancer illness code, self-reported: duodenal ulcer || id:ukb-b-4725	|| id:ebi-a-GCST90002080	Inverse variance weighted	0.0603919	1	0.805878
Gastric ulcer	ebi-a-GCST90001426	ebi-a-GCST90018851	Gastric ulcer || id:ebi-a-GCST90018851	|| id:ebi-a-GCST90001426	MR Egger	4.11927	5	0.532375
	ebi-a-GCST90001426	ebi-a-GCST90018851	Gastric ulcer || id:ebi-a-GCST90018851	|| id:ebi-a-GCST90001426	Inverse variance weighted	4.2401	6	0.64422
	ebi-a-GCST90001466	ebi-a-GCST90018851	Gastric ulcer || id:ebi-a-GCST90018851	|| id:ebi-a-GCST90001466	MR Egger	0.295522	1	0.586703
	ebi-a-GCST90001466	ebi-a-GCST90018851	Gastric ulcer || id:ebi-a-GCST90018851	|| id:ebi-a-GCST90001466	Inverse variance weighted	0.55708	2	0.756888
	ebi-a-GCST90001482	ebi-a-GCST90018851	Gastric ulcer || id:ebi-a-GCST90018851	|| id:ebi-a-GCST90001482	MR Egger	8.11621	11	0.702858
	ebi-a-GCST90001482	ebi-a-GCST90018851	Gastric ulcer || id:ebi-a-GCST90018851	|| id:ebi-a-GCST90001482	Inverse variance weighted	8.18669	12	0.770376
	ebi-a-GCST90001497	ebi-a-GCST90018851	Gastric ulcer || id:ebi-a-GCST90018851	|| id:ebi-a-GCST90001497	MR Egger	5.38488	6	0.495478
	ebi-a-GCST90001497	ebi-a-GCST90018851	Gastric ulcer || id:ebi-a-GCST90018851	|| id:ebi-a-GCST90001497	Inverse variance weighted	5.88975	7	0.552681
	ebi-a-GCST90001524	ebi-a-GCST90018851	Gastric ulcer || id:ebi-a-GCST90018851	|| id:ebi-a-GCST90001524	MR Egger	1.15883	1	0.281709
	ebi-a-GCST90001524	ebi-a-GCST90018851	Gastric ulcer || id:ebi-a-GCST90018851	|| id:ebi-a-GCST90001524	Inverse variance weighted	2.62165	2	0.269597
	ebi-a-GCST90001545	ebi-a-GCST90018851	Gastric ulcer || id:ebi-a-GCST90018851	|| id:ebi-a-GCST90001545	MR Egger	0.17392	2	0.916714
	ebi-a-GCST90001545	ebi-a-GCST90018851	Gastric ulcer || id:ebi-a-GCST90018851	|| id:ebi-a-GCST90001545	Inverse variance weighted	0.584957	3	0.899867
	ebi-a-GCST90001590	ebi-a-GCST90018851	Gastric ulcer || id:ebi-a-GCST90018851	|| id:ebi-a-GCST90001590	MR Egger	1.5345	2	0.464288
	ebi-a-GCST90001590	ebi-a-GCST90018851	Gastric ulcer || id:ebi-a-GCST90018851	|| id:ebi-a-GCST90001590	Inverse variance weighted	2.55521	3	0.465396
	ebi-a-GCST90001600	ebi-a-GCST90018851	Gastric ulcer || id:ebi-a-GCST90018851	|| id:ebi-a-GCST90001600	MR Egger	0.170923	1	0.679293
	ebi-a-GCST90001600	ebi-a-GCST90018851	Gastric ulcer || id:ebi-a-GCST90018851	|| id:ebi-a-GCST90001600	Inverse variance weighted	1.46776	2	0.480042
	ebi-a-GCST90001663	ebi-a-GCST90018851	Gastric ulcer || id:ebi-a-GCST90018851	|| id:ebi-a-GCST90001663	MR Egger	1.00781	2	0.604166
	ebi-a-GCST90001663	ebi-a-GCST90018851	Gastric ulcer || id:ebi-a-GCST90018851	|| id:ebi-a-GCST90001663	Inverse variance weighted	1.33553	3	0.720714
	ebi-a-GCST90001737	ebi-a-GCST90018851	Gastric ulcer || id:ebi-a-GCST90018851	|| id:ebi-a-GCST90001737	MR Egger	0.645796	2	0.724048
	ebi-a-GCST90001737	ebi-a-GCST90018851	Gastric ulcer || id:ebi-a-GCST90018851	|| id:ebi-a-GCST90001737	Inverse variance weighted	3.49191	3	0.321813
	ebi-a-GCST90001746	ebi-a-GCST90018851	Gastric ulcer || id:ebi-a-GCST90018851	|| id:ebi-a-GCST90001746	MR Egger	10.8375	7	0.145868
	ebi-a-GCST90001746	ebi-a-GCST90018851	Gastric ulcer || id:ebi-a-GCST90018851	|| id:ebi-a-GCST90001746	Inverse variance weighted	11.4963	8	0.17513
	ebi-a-GCST90001757	ebi-a-GCST90018851	Gastric ulcer || id:ebi-a-GCST90018851	|| id:ebi-a-GCST90001757	MR Egger	9.9111	9	0.35773
	ebi-a-GCST90001757	ebi-a-GCST90018851	Gastric ulcer || id:ebi-a-GCST90018851	|| id:ebi-a-GCST90001757	Inverse variance weighted	10.5788	10	0.391259
	ebi-a-GCST90001760	ebi-a-GCST90018851	Gastric ulcer || id:ebi-a-GCST90018851	|| id:ebi-a-GCST90001760	MR Egger	10.3446	6	0.110871
	ebi-a-GCST90001760	ebi-a-GCST90018851	Gastric ulcer || id:ebi-a-GCST90018851	|| id:ebi-a-GCST90001760	Inverse variance weighted	15.1795	7	0.0337657
	ebi-a-GCST90001939	ebi-a-GCST90018851	Gastric ulcer || id:ebi-a-GCST90018851	|| id:ebi-a-GCST90001939	MR Egger	2.60409	1	0.106588
	ebi-a-GCST90001939	ebi-a-GCST90018851	Gastric ulcer || id:ebi-a-GCST90018851	|| id:ebi-a-GCST90001939	Inverse variance weighted	2.65827	2	0.264707
	ebi-a-GCST90001941	ebi-a-GCST90018851	Gastric ulcer || id:ebi-a-GCST90018851	|| id:ebi-a-GCST90001941	MR Egger	0.477549	2	0.787592
	ebi-a-GCST90001941	ebi-a-GCST90018851	Gastric ulcer || id:ebi-a-GCST90018851	|| id:ebi-a-GCST90001941	Inverse variance weighted	0.546372	3	0.908592
	ebi-a-GCST90001942	ebi-a-GCST90018851	Gastric ulcer || id:ebi-a-GCST90018851	|| id:ebi-a-GCST90001942	MR Egger	0.0422193	2	0.979112
	ebi-a-GCST90001942	ebi-a-GCST90018851	Gastric ulcer || id:ebi-a-GCST90018851	|| id:ebi-a-GCST90001942	Inverse variance weighted	0.0849053	3	0.993585
	ebi-a-GCST90001944	ebi-a-GCST90018851	Gastric ulcer || id:ebi-a-GCST90018851	|| id:ebi-a-GCST90001944	MR Egger	0.66615	2	0.716717
	ebi-a-GCST90001944	ebi-a-GCST90018851	Gastric ulcer || id:ebi-a-GCST90018851	|| id:ebi-a-GCST90001944	Inverse variance weighted	0.782364	3	0.853681
	ebi-a-GCST90001945	ebi-a-GCST90018851	Gastric ulcer || id:ebi-a-GCST90018851	|| id:ebi-a-GCST90001945	MR Egger	0.65683	2	0.720064
	ebi-a-GCST90001945	ebi-a-GCST90018851	Gastric ulcer || id:ebi-a-GCST90018851	|| id:ebi-a-GCST90001945	Inverse variance weighted	0.756668	3	0.859801
	ebi-a-GCST90002020	ebi-a-GCST90018851	Gastric ulcer || id:ebi-a-GCST90018851	|| id:ebi-a-GCST90002020	MR Egger	0.187907	2	0.910325
	ebi-a-GCST90002020	ebi-a-GCST90018851	Gastric ulcer || id:ebi-a-GCST90018851	|| id:ebi-a-GCST90002020	Inverse variance weighted	1.13107	3	0.769579
	ebi-a-GCST90002037	ebi-a-GCST90018851	Gastric ulcer || id:ebi-a-GCST90018851	|| id:ebi-a-GCST90002037	MR Egger	0.111382	2	0.945831
	ebi-a-GCST90002037	ebi-a-GCST90018851	Gastric ulcer || id:ebi-a-GCST90018851	|| id:ebi-a-GCST90002037	Inverse variance weighted	0.765593	3	0.857678
	ebi-a-GCST90002038	ebi-a-GCST90018851	Gastric ulcer || id:ebi-a-GCST90018851	|| id:ebi-a-GCST90002038	MR Egger	0.110963	2	0.946029
	ebi-a-GCST90002038	ebi-a-GCST90018851	Gastric ulcer || id:ebi-a-GCST90018851	|| id:ebi-a-GCST90002038	Inverse variance weighted	0.743699	3	0.86288
	ebi-a-GCST90002046	ebi-a-GCST90018851	Gastric ulcer || id:ebi-a-GCST90018851	|| id:ebi-a-GCST90002046	MR Egger	4.51017	4	0.341344
	ebi-a-GCST90002046	ebi-a-GCST90018851	Gastric ulcer || id:ebi-a-GCST90018851	|| id:ebi-a-GCST90002046	Inverse variance weighted	5.26478	5	0.384428
	ebi-a-GCST90002074	ebi-a-GCST90018851	Gastric ulcer || id:ebi-a-GCST90018851	|| id:ebi-a-GCST90002074	MR Egger	3.17627	8	0.922814
	ebi-a-GCST90002074	ebi-a-GCST90018851	Gastric ulcer || id:ebi-a-GCST90018851	|| id:ebi-a-GCST90002074	Inverse variance weighted	3.99915	9	0.911469

## Sheet: pleiotropy
Table 2. Pleiotropy test.
	id.exposure	id.outcome	outcome	exposure	egger_intercept	se	pval
Chronic gastritis	ebi-a-GCST90001527	ukb-b-6716	Diagnoses - main ICD10: K29.5 Chronic gastritis, unspecified || id:ukb-b-6716	|| id:ebi-a-GCST90001527	-0.000244918	0.000207564	0.447563
	ebi-a-GCST90001544	ukb-b-6716	Diagnoses - main ICD10: K29.5 Chronic gastritis, unspecified || id:ukb-b-6716	|| id:ebi-a-GCST90001544	6.00814e-06	0.000535924	0.992863
	ebi-a-GCST90001574	ukb-b-6716	Diagnoses - main ICD10: K29.5 Chronic gastritis, unspecified || id:ukb-b-6716	|| id:ebi-a-GCST90001574	0.000205773	0.000204238	0.497618
	ebi-a-GCST90001682	ukb-b-6716	Diagnoses - main ICD10: K29.5 Chronic gastritis, unspecified || id:ukb-b-6716	|| id:ebi-a-GCST90001682	3.64753e-05	0.000535285	0.956687
	ebi-a-GCST90001755	ukb-b-6716	Diagnoses - main ICD10: K29.5 Chronic gastritis, unspecified || id:ukb-b-6716	|| id:ebi-a-GCST90001755	9.94896e-06	0.000278346	0.974734
	ebi-a-GCST90001759	ukb-b-6716	Diagnoses - main ICD10: K29.5 Chronic gastritis, unspecified || id:ukb-b-6716	|| id:ebi-a-GCST90001759	-4.51769e-05	0.000335883	0.899502
	ebi-a-GCST90001761	ukb-b-6716	Diagnoses - main ICD10: K29.5 Chronic gastritis, unspecified || id:ukb-b-6716	|| id:ebi-a-GCST90001761	1.94528e-05	0.000193893	0.929235
	ebi-a-GCST90001762	ukb-b-6716	Diagnoses - main ICD10: K29.5 Chronic gastritis, unspecified || id:ukb-b-6716	|| id:ebi-a-GCST90001762	-4.15071e-05	0.000294333	0.89467
	ebi-a-GCST90001980	ukb-b-6716	Diagnoses - main ICD10: K29.5 Chronic gastritis, unspecified || id:ukb-b-6716	|| id:ebi-a-GCST90001980	-1.19139e-05	0.000106615	0.918082
	ebi-a-GCST90001985	ukb-b-6716	Diagnoses - main ICD10: K29.5 Chronic gastritis, unspecified || id:ukb-b-6716	|| id:ebi-a-GCST90001985	-1.43209e-05	0.000140345	0.928034
	ebi-a-GCST90001989	ukb-b-6716	Diagnoses - main ICD10: K29.5 Chronic gastritis, unspecified || id:ukb-b-6716	|| id:ebi-a-GCST90001989	NA	NA	NA
	ebi-a-GCST90002006	ukb-b-6716	Diagnoses - main ICD10: K29.5 Chronic gastritis, unspecified || id:ukb-b-6716	|| id:ebi-a-GCST90002006	9.18248e-06	0.000150876	0.961302
	ebi-a-GCST90002090	ukb-b-6716	Diagnoses - main ICD10: K29.5 Chronic gastritis, unspecified || id:ukb-b-6716	|| id:ebi-a-GCST90002090	-0.000184741	0.000443772	0.748869
Duodenal ulcer	ebi-a-GCST90001703	ukb-b-4725	Non-cancer illness code, self-reported: duodenal ulcer || id:ukb-b-4725	|| id:ebi-a-GCST90001703	-1.35289e-05	0.000187035	0.948919
	ebi-a-GCST90001711	ukb-b-4725	Non-cancer illness code, self-reported: duodenal ulcer || id:ukb-b-4725	|| id:ebi-a-GCST90001711	-0.000150515	0.000238869	0.642048
	ebi-a-GCST90001757	ukb-b-4725	Non-cancer illness code, self-reported: duodenal ulcer || id:ukb-b-4725	|| id:ebi-a-GCST90001757	0.000231748	0.000191372	0.292555
	ebi-a-GCST90001782	ukb-b-4725	Non-cancer illness code, self-reported: duodenal ulcer || id:ukb-b-4725	|| id:ebi-a-GCST90001782	NA	NA	NA
	ebi-a-GCST90001886	ukb-b-4725	Non-cancer illness code, self-reported: duodenal ulcer || id:ukb-b-4725	|| id:ebi-a-GCST90001886	0.000219362	0.000264384	0.493968
	ebi-a-GCST90001959	ukb-b-4725	Non-cancer illness code, self-reported: duodenal ulcer || id:ukb-b-4725	|| id:ebi-a-GCST90001959	0.00109322	0.00134663	0.565884
	ebi-a-GCST90002057	ukb-b-4725	Non-cancer illness code, self-reported: duodenal ulcer || id:ukb-b-4725	|| id:ebi-a-GCST90002057	8.81818e-06	0.000201628	0.972175
	ebi-a-GCST90002080	ukb-b-4725	Non-cancer illness code, self-reported: duodenal ulcer || id:ukb-b-4725	|| id:ebi-a-GCST90002080	NA	NA	NA
Gastric ulcer	ebi-a-GCST90001426	ebi-a-GCST90018851	Gastric ulcer || id:ebi-a-GCST90018851	|| id:ebi-a-GCST90001426	-0.00413481	0.0118949	0.742287
	ebi-a-GCST90001466	ebi-a-GCST90018851	Gastric ulcer || id:ebi-a-GCST90018851	|| id:ebi-a-GCST90001466	0.017395	0.0340128	0.69904
	ebi-a-GCST90001482	ebi-a-GCST90018851	Gastric ulcer || id:ebi-a-GCST90018851	|| id:ebi-a-GCST90001482	-0.00292168	0.0110047	0.795539
	ebi-a-GCST90001497	ebi-a-GCST90018851	Gastric ulcer || id:ebi-a-GCST90018851	|| id:ebi-a-GCST90001497	-0.00845716	0.0119024	0.504038
	ebi-a-GCST90001524	ebi-a-GCST90018851	Gastric ulcer || id:ebi-a-GCST90018851	|| id:ebi-a-GCST90001524	-0.0201961	0.0179755	0.463006
	ebi-a-GCST90001545	ebi-a-GCST90018851	Gastric ulcer || id:ebi-a-GCST90018851	|| id:ebi-a-GCST90001545	0.01106	0.0172511	0.587106
	ebi-a-GCST90001590	ebi-a-GCST90018851	Gastric ulcer || id:ebi-a-GCST90018851	|| id:ebi-a-GCST90001590	-0.0204973	0.0202883	0.418705
	ebi-a-GCST90001600	ebi-a-GCST90018851	Gastric ulcer || id:ebi-a-GCST90018851	|| id:ebi-a-GCST90001600	0.037405	0.0328463	0.458747
	ebi-a-GCST90001663	ebi-a-GCST90018851	Gastric ulcer || id:ebi-a-GCST90018851	|| id:ebi-a-GCST90001663	0.0191268	0.0334113	0.624782
	ebi-a-GCST90001737	ebi-a-GCST90018851	Gastric ulcer || id:ebi-a-GCST90018851	|| id:ebi-a-GCST90001737	-0.167396	0.0992244	0.233646
	ebi-a-GCST90001746	ebi-a-GCST90018851	Gastric ulcer || id:ebi-a-GCST90018851	|| id:ebi-a-GCST90001746	-0.0232404	0.0356252	0.534997
	ebi-a-GCST90001757	ebi-a-GCST90018851	Gastric ulcer || id:ebi-a-GCST90018851	|| id:ebi-a-GCST90001757	-0.0121855	0.015649	0.456154
	ebi-a-GCST90001760	ebi-a-GCST90018851	Gastric ulcer || id:ebi-a-GCST90018851	|| id:ebi-a-GCST90001760	0.0695742	0.0415464	0.145032
	ebi-a-GCST90001939	ebi-a-GCST90018851	Gastric ulcer || id:ebi-a-GCST90018851	|| id:ebi-a-GCST90001939	-0.00532123	0.0368935	0.908808
	ebi-a-GCST90001941	ebi-a-GCST90018851	Gastric ulcer || id:ebi-a-GCST90018851	|| id:ebi-a-GCST90001941	0.00375407	0.0143099	0.817608
	ebi-a-GCST90001942	ebi-a-GCST90018851	Gastric ulcer || id:ebi-a-GCST90018851	|| id:ebi-a-GCST90001942	-0.00330062	0.0159754	0.855442
	ebi-a-GCST90001944	ebi-a-GCST90018851	Gastric ulcer || id:ebi-a-GCST90018851	|| id:ebi-a-GCST90001944	-0.0082262	0.0241307	0.765658
	ebi-a-GCST90001945	ebi-a-GCST90018851	Gastric ulcer || id:ebi-a-GCST90018851	|| id:ebi-a-GCST90001945	-0.00776624	0.024579	0.781951
	ebi-a-GCST90002020	ebi-a-GCST90018851	Gastric ulcer || id:ebi-a-GCST90018851	|| id:ebi-a-GCST90002020	0.0768573	0.0791391	0.433909
	ebi-a-GCST90002037	ebi-a-GCST90018851	Gastric ulcer || id:ebi-a-GCST90018851	|| id:ebi-a-GCST90002037	-0.0235212	0.0290805	0.503532
	ebi-a-GCST90002038	ebi-a-GCST90018851	Gastric ulcer || id:ebi-a-GCST90018851	|| id:ebi-a-GCST90002038	-0.0237273	0.0298289	0.509761
	ebi-a-GCST90002046	ebi-a-GCST90018851	Gastric ulcer || id:ebi-a-GCST90018851	|| id:ebi-a-GCST90002046	-0.0102434	0.0125212	0.459242
	ebi-a-GCST90002074	ebi-a-GCST90018851	Gastric ulcer || id:ebi-a-GCST90018851	|| id:ebi-a-GCST90002074	-0.00880147	0.00970257	0.390844
